# Supplementary material for: Microstructural White Matter Abnormalities and Cognitive Functioning in Type 2 Diabetes
Source: Oxford University Press journal article supplement (doi:10.2337/dc12-0493), 2012-09-08
Supplement: dc120493supplementarydata.pdf [file dc120493supplementarydata.pdf]

# SUPPLEMENTARY DATA

**Supplementary Table 1.** Raw cognitive test scores and normalized z-scores

|                                            | Raw test scores |            |            | Z-scores <sup>a</sup> |            |
|--------------------------------------------|-----------------|------------|------------|-----------------------|------------|
|                                            | Range of scores | Controls   | T2DM       | Controls              | T2DM       |
| <b>Information processing speed</b>        |                 |            |            |                       |            |
| Trail Making Test part A (sec)             | 27-125          | 46.5±9.0   | 49.6±18.3  | 0.11±0.62             | -0.11±1.27 |
| Stroop Color Word Test (mean I+II) (sec)   | 42-81           | 57.0±6.3   | 55.0±7.5   | -0.13±0.91            | 0.14±1.08  |
| Symbol substitution test (digits)          | 23-84           | 52.5±11.2  | 51.7±14.9  | 0.03±0.85             | -0.03±1.34 |
| <b>Attention and Executive functioning</b> |                 |            |            |                       |            |
| Trail Making Test part B (sec)#            | 39-300          | 95.6±23.6  | 108.3±49.0 | 0.08±0.95             | -0.08±1.06 |
| Stroop Color Word Test III (sec)#          | 67-300          | 118.5±29.7 | 117.8±41.4 | 0.03±0.83             | -0.03±1.04 |
| Letter fluency (mean N+A)                  | 3-25            | 11.1±4.1   | 10.5±4.0   | 0.06±0.94             | -0.06±0.92 |
| Category fluency (No. of animals)          | 15-59           | 31.9±8.6   | 33.3±8.4   | -0.08±1.02            | 0.09±0.99  |
| <b>Memory</b>                              |                 |            |            |                       |            |
| RALVT total trials 1-5 (words)             | 18-61           | 34.7±9.5   | 32.6±8.4   | 0.12±1.06             | -0.12±0.94 |
| RAVLT delay (words)                        | 0-15            | 6.3±3.2    | 5.9±2.7    | 0.03±0.96             | -0.03±1.05 |

Raw test scores per group are represented as mean±SD or median (range). RALVT: Rey Auditory Verbal Learning Test.

<sup>a</sup>Z-scores are transformed such that higher scores indicate better performance. # Z-scores are adjusted for performance on information processing speed (i.e. Trail Making Test A and Stroop Test I+II respectively).
